# Supplementary material for: Effects of Managed and Unmanaged Floral Margins on Pollination Services and Production in Melon Crops
Source: MDPI journal article supplement (doi:10.3390/insects14030296), 2023-03-20
Supplement: s1 [file s1]

## Supplementary Material

**Table S1.** Species of plants sampled in the three treatments. The species sown or transplanted in managed herbaceous and shrubby margins are shown in bold; the rest of the species were naturally emerged plants. UH: unmanaged herbaceous margins; MH: managed herbaceous margins; MS: managed shrubby margins.

| Family          | Plant Species                            | Margin |    |    |
|-----------------|------------------------------------------|--------|----|----|
|                 |                                          | UH     | MH | MS |
| Apiaceae        | <i>Conium</i> sp.                        | x      | x  |    |
|                 | <b><i>Coriandrum sativum</i></b>         | x      | x  |    |
|                 | <i>Foeniculum vulgare</i>                | x      |    |    |
| Asteraceae      | <i>Anacyclus</i> sp.                     | x      | x  |    |
|                 | Asteraceae                               | x      | x  |    |
|                 | <i>Calendula arvensis</i>                | x      | x  |    |
|                 | <i>Calendula</i> sp.                     | x      | x  |    |
|                 | <i>Carduus</i> sp.                       | x      | x  |    |
|                 | <b><i>Chrysanthemum coronarium</i></b>   | x      | x  |    |
|                 | <b><i>Matricaria chamomilla</i></b>      |        | x  |    |
|                 | <b><i>Santolina chamaecyparissus</i></b> |        |    | x  |
|                 | <i>Sonchus</i> spp.                      | x      | x  |    |
| Boraginaceae    | <b><i>Borago officinalis</i></b>         |        | x  |    |
|                 | <b><i>Echium vulgare</i></b>             | x      | x  |    |
| Brassicaceae    | <i>Brassica</i> sp.                      | x      | x  |    |
|                 | Brassicaceae                             | x      |    |    |
|                 | <i>Carrichtera annua</i>                 | x      | x  |    |
|                 | <b><i>Diplotaxis catholica</i></b>       |        | x  |    |
|                 | <i>Diplotaxis eruroides</i>              | x      | x  |    |
|                 | <i>Eruca vesicaria</i>                   | x      | x  |    |
|                 | <i>Moricandia arvensis</i>               | x      | x  |    |
|                 | <i>Rapistrum</i> sp.                     | x      | x  |    |
|                 | <i>Sisymbrium</i> sp.                    | x      | x  |    |
| Caryophyllaceae | <b><i>Silene vulgaris</i></b>            |        | x  |    |
| Convolvulaceae  | <i>Convolvulus</i> sp.                   | x      | x  |    |
| Fabaceae        | <b><i>Dorycnium pentaphyllum</i></b>     |        |    | x  |
|                 | <i>Medicago</i> sp.                      |        | x  |    |
|                 | <b><i>Melilotus officinalis</i></b>      | x      | x  |    |
|                 | <b><i>Vicia sativa</i></b>               |        | x  |    |
| Lamiaceae       | <b><i>Ballota hirsuta</i></b>            |        |    | x  |
|                 | <i>Lamium</i> sp.                        |        | x  |    |
|                 | <b><i>Lavandula dentata</i></b>          |        |    | x  |
|                 | <b><i>Lavandula stoechas</i></b>         |        |    | x  |
|                 | <b><i>Marrubium</i> sp.</b>              | x      |    |    |
|                 | <b><i>Phlomis purpurea</i></b>           |        |    | x  |
|                 | <b><i>Rosmarinus officinalis</i></b>     |        |    | x  |
|                 | <b><i>Salvia officinalis</i></b>         |        |    | x  |
|                 | <b><i>Salvia verbenaca</i></b>           |        | x  |    |
|                 | <b><i>Thymus mastichina</i></b>          |        |    | x  |
| Ranunculaceae   | <b><i>Nigella damascena</i></b>          |        | x  |    |

**Table S2.** Results of GLMM for the effect of the type of floral margin, year, their interaction (type of floral margin\*year), and distance from the margin on the abundance of the different bee groups in pan traps on melon crops. df: degrees of freedom.

| Group               | Treatment       |    |         | Year            |    |         | Treatment*Year  |    |         | Distance        |    |         |
|---------------------|-----------------|----|---------|-----------------|----|---------|-----------------|----|---------|-----------------|----|---------|
|                     | $\chi^2$ -value | df | P-value |
| Andrenidae          | 1.0             | 2  | 0.602   | 0.3             | 1  | 0.590   | 30.8            | 2  | <0.001  | 7.3             | 1  | 0.007   |
| <i>A. mellifera</i> | 6.6             | 2  | 0.036   | 1.0             | 1  | 0.308   | 5.5             | 2  | 0.063   | 0.2             | 1  | 0.667   |
| Apidae              | 32.8            | 2  | <0.001  | 0.6             | 1  | 0.453   | 2.8             | 2  | 0.249   | 4.9             | 1  | 0.026   |
| Colletidae          | 1.5             | 2  | 0.458   | 8.4             | 1  | 0.003   | 4.3             | 2  | 0.115   | 0.5             | 1  | 0.473   |
| Halictidae          | 2.3             | 2  | 0.319   | 26.3            | 1  | <0.001  | 5.0             | 2  | 0.081   | 0.4             | 1  | 0.543   |
| Megachilidae        | 0.7             | 2  | 0.688   | 1.2             | 1  | 0.281   | 8.6             | 2  | 0.013   | 0.3             | 1  | 0.590   |
